# Supplementary material
Source: MDPI journal article supplement (https://www.mdpi.com/2304-8158/10/10/2501)
Supplement: s1 [file s1]

Archive with 2 entries (2 files):
- Supplementary file 1. Characteristics of extruded and fermented wheat bran edited.pdf
- Supplementary file 2. Procedure of the FaceReader analysis.pdf
